# Supplementary material
Source: HighWire-hosted journal article supplement (https://bmjopen.bmj.com/content/9/4/e025790)
Supplement: inline-supplementary-material-2 [file inline-supplementary-material-2.pdf]

**Supplementary Table 1 Details of included studies**

| Author (Year) Country                        | N analysed/N recruited | Inclusion criteria                                                                                                                                           | Description of included patients                                                                                                                                                                                                                                             | Details of previous surgery                                                                     | Needle level   | Anaesthetic details          | Guided method                  | Needle provocation | Number of control injections | Time to pain measurement     |
|----------------------------------------------|------------------------|--------------------------------------------------------------------------------------------------------------------------------------------------------------|------------------------------------------------------------------------------------------------------------------------------------------------------------------------------------------------------------------------------------------------------------------------------|-------------------------------------------------------------------------------------------------|----------------|------------------------------|--------------------------------|--------------------|------------------------------|------------------------------|
| <i>Within patient case-control studies</i>   |                        |                                                                                                                                                              |                                                                                                                                                                                                                                                                              |                                                                                                 |                |                              |                                |                    |                              |                              |
| Yeom <sup>26</sup><br>(2008)<br>NR           | 47/8<br>3              | Patients due to undergo a lumbar spine operation with single-level, unilateral lumbosacral radiculopathy confirmed by clinical, radiographic & MRI findings. | Patients with established pure radiculopathy from a single level. Affected roots were L4 in 3, L5 in 31, S1 in 13. Concordant imaging & clinical findings.                                                                                                                   | No history of lumbar surgeries                                                                  | L3, L4, L5, S1 | 1ml of 2% Lidocaine          | Fluoroscopy                    | No                 | 1 or 2                       | 30 minutes                   |
| North <sup>29</sup><br>(1996) USA            | 33/3<br>3              | Patients with sciatica with or without low back pain, attributed to spinal pathology.                                                                        | Established sciatica patients with or without low back pain. All had L5 or S1 radiculopathy. 52% had diagnostic imaging findings of ongoing nerve root compression. The remaining 48% had a well-documented history of root compression which had been corrected surgically. | 48% history of root compression corrected surgically.                                           | L5, S1         | 3ml of 0.5% Bupivacaine      | Fluoroscopy                    | Yes                | 3                            | Every 15 minutes for 3 hours |
| <i>Prospective diagnostic cohort studies</i> |                        |                                                                                                                                                              |                                                                                                                                                                                                                                                                              |                                                                                                 |                |                              |                                |                    |                              |                              |
| Schutz <sup>31</sup><br>(1973)<br>Canada     | 15/2<br>3              | Patients with current sciatica.                                                                                                                              | Patients with sciatica. Investigation undertaken only at a time when sciatica symptoms actually present.                                                                                                                                                                     | 1 patient had previous surgery, unsuccessful SNRB & excluded from analysis. Unclear if patients | NR             | 1ml of Procaine (concentrati | Guided but method not reported | Yes                | 1 or 2                       | Immediate                    |

| Author (Year) Country                          | N analysed/N recruited | Inclusion criteria                                                                                                         | Description of included patients                                                                                                                                                                                          | Details of previous surgery                                                                                   | Needle level       | Anaesthetic details                               | Guided method | Needle provocation | Number of control injections | Time to pain measurement |
|------------------------------------------------|------------------------|----------------------------------------------------------------------------------------------------------------------------|---------------------------------------------------------------------------------------------------------------------------------------------------------------------------------------------------------------------------|---------------------------------------------------------------------------------------------------------------|--------------------|---------------------------------------------------|---------------|--------------------|------------------------------|--------------------------|
|                                                |                        |                                                                                                                            |                                                                                                                                                                                                                           | included in analysis had previous surgeries.                                                                  |                    | on not reported)                                  |               |                    |                              |                          |
| <i>Retrospective diagnostic cohort studies</i> |                        |                                                                                                                            |                                                                                                                                                                                                                           |                                                                                                               |                    |                                                   |               |                    |                              |                          |
| Sasso <sup>29</sup><br>(2005)<br>USA           | 83/8<br>3              | Patients who underwent SNRB, MRI & nerve root decompression surgery and had a follow-up evaluation >12 months post surgery | Patients with cervical or lumbar radiculopathy. Discordant imaging and clinical findings                                                                                                                                  | Unclear how many previous lumbar surgeries. 20 patients with cervical or lumbar symptoms had previous surgery | NR                 | 0.5-0.7ml of 2% Lidocaine                         | Fluoroscopy   | Yes                | NR                           | Immediate                |
| Dooley <sup>32</sup><br>(1988)<br>Canada       | 62/7<br>3              | Patients who underwent nerve root infiltration                                                                             | Patients with radicular pain who underwent nerve root infiltration                                                                                                                                                        | 32 ≥1 previous surgery, 3 had 4 surgeries.                                                                    | L3, L4, L5, S1     | 1ml of 1% Mepivacaine or Lidocaine                | Fluoroscopy   | Yes                | NR                           | Immediate                |
| Williams <sup>28</sup><br>(2015) UK            | 96/1<br>00             | Patients who underwent diagnostic lumbar DRGB (identified retrospectively)                                                 | Patients with presumed radicular leg pain with significant diagnostic uncertainty from the patient's presenting history, examination and imaging as to whether lumbosacral nerve root compression was indeed responsible. | NR                                                                                                            | L1, L3, L4, L5, S1 | 2 mL of 1% Lidocaine and 0.5 to 1 mL of Iopamidol | Fluoroscopy   | Yes                | NR                           | Immediate                |

Abbreviations: DRGB, dorsal root ganglion block; NR, not reported; MRI, Magnetic resonance imaging; SNRB, selective nerve root block.
