# Supplementary material
Source: HighWire-hosted journal article supplement (https://bmjopen.bmj.com/content/9/4/e025790)
Supplement: inline-supplementary-material-3 [file inline-supplementary-material-3.pdf]

**Supplementary Table 2** Patient characteristics of studies reporting on adverse events following SNRB

| Author (year)<br>Country                  | N analysed/<br>N recruited | Inclusion criteria                                                                                                                                                                                                                                                   | Needle tip<br>position                                                                                       | Needle levels | Anaesthetic<br>details                                  | Guided method          | Needle<br>provocation used? | Adverse events                                                                                       |
|-------------------------------------------|----------------------------|----------------------------------------------------------------------------------------------------------------------------------------------------------------------------------------------------------------------------------------------------------------------|--------------------------------------------------------------------------------------------------------------|---------------|---------------------------------------------------------|------------------------|-----------------------------|------------------------------------------------------------------------------------------------------|
| <i>Case-series</i>                        |                            |                                                                                                                                                                                                                                                                      |                                                                                                              |               |                                                         |                        |                             |                                                                                                      |
| Stalcup <sup>32</sup><br>(2006)<br>USA    | 1203/<br>1203              | All adult patients who underwent a SNRB in the lumbar spine in a radiology department.                                                                                                                                                                               | Adjacent or into the intervertebral foramen.                                                                 | NR            | 1-2ml of<br>0.25%<br>Bupivacaine                        | Fluoroscopy            | NR                          | Numbers given in injections:<br>Leg weakness n=77;<br>Pain increased n=51;<br>Other n=6; Total n=134 |
| Ng <sup>35</sup><br>(2004)<br>UK          | 117/<br>125                | Consecutive patients with clinical evidence of unilateral radicular pain that lasted despite at least 6 weeks of conservative management, MRI confirmation of nerve root compression secondary to lumbar disc herniation or peripheral degenerative spinal stenosis. | Superiorly to pedicle, medially to nerve and laterally to vertebral body.                                    | NR            | 2ml of<br>0.25%<br>Bupivacaine                          | Assumed<br>Fluoroscopy | NR                          | No adverse events                                                                                    |
| Jonsson <sup>34</sup><br>(1988)<br>Sweden | 78/<br>78                  | Patients with unilateral sciatic pain, considered for surgery. Sciatic pain but normal findings on myelography, CT and/or MRI.                                                                                                                                       | Just lateral to the opening of the intervertebral foramen.                                                   | L4,<br>L5, S1 | 3-6ml of<br>Carbocaine<br>(% NR)                        | Fluoroscopy            | NR                          | No adverse events.                                                                                   |
| Quinn <sup>36</sup><br>(1988)<br>USA      | 33/<br>33                  | Patients with a herniated disc or foraminal stenosis (n=2) as identified by CT or MRI.                                                                                                                                                                               | An attempt was made to pierce the nerve or to have the needle tip within 1-2mm of the nerve.                 | NR            | 2.5-5ml of<br>1%<br>Lidocaine or<br>0.5%<br>Bupivacaine | CT                     | Yes                         | No adverse events.                                                                                   |
| Tajima <sup>37</sup><br>(1980)<br>Japan   | 106/<br>106                | Patients with radicular symptoms undergoing lumbosacral radiculography and block who had lumbosacral diseases.                                                                                                                                                       | Approx 4cm lateral to upper margin of lumbar spinous process corresponding to nerve root to be radiographed. | L4,<br>L5, S1 | 3ml of 1%<br>Lidocaine                                  | x-ray                  | Yes                         | Pain in the lower extremity was aggravated for 1-2 days                                              |

following selective  
radiculography and  
block in 4 patients.  
There was no other  
complication.

| <i>Diagnostic cohort study</i>                 |            |                                                                                                                                                                                                                                                                        |                                                                                                                                                |                                                                                 |                                      |     |                                                                               |  |
|------------------------------------------------|------------|------------------------------------------------------------------------------------------------------------------------------------------------------------------------------------------------------------------------------------------------------------------------|------------------------------------------------------------------------------------------------------------------------------------------------|---------------------------------------------------------------------------------|--------------------------------------|-----|-------------------------------------------------------------------------------|--|
| *Schutz <sup>31</sup><br>(1973)<br>Canada      | 15/<br>23  | Patients with current sciatica.                                                                                                                                                                                                                                        | Superior level of intervertebral foramen. NR<br>Introduced about 2" from the midline.                                                          | 1ml<br>Procaine                                                                 | Guided but<br>method not<br>reported | Yes | No adverse events.                                                            |  |
| *Williams <sup>28</sup><br>(2015)<br>UK        | 96/100     | Patients with presumed radicular leg pain who<br>underwent diagnostic lumbar DRGB (identified<br>retrospectively).                                                                                                                                                     | Inserted from a paraspinal entry point<br>and advanced to the superoanterior<br>margin of the intervertebral<br>foramen of the targeted level. | L1,L3, 2 mL of 1%<br>L4,L5 Lidocaine<br>& S1 and 0.5 to 1<br>mL of<br>Iopamidol | Fluoroscopy                          | Yes | No adverse events.                                                            |  |
| <i>Randomized controlled trial</i>             |            |                                                                                                                                                                                                                                                                        |                                                                                                                                                |                                                                                 |                                      |     |                                                                               |  |
| Ghahreman <sup>33</sup><br>(2010)<br>Australia | 27/<br>150 | Adult patients with lower limb radiculopathy; limitation<br>of straight-leg raise to <30°; disc herniation on CT or<br>MRI. Considered for surgery. Only data for single arm<br>of trial in which patients received anaesthetic was<br>included in the current review. | Placed in the intervertebral foramen of<br>the target level.                                                                                   | L2,L3, 2ml of 0.5%<br>L4,L5 Bupivacaine<br>& S1                                 | Assumed<br>Fluoroscopy               | NR  | No complications<br>occurred that could be<br>attributed to the<br>treatment. |  |

\*Included in diagnostic accuracy systematic review

Abbreviations: CT, computerised tomography; DRGB, dorsal root ganglion block; MRI, magnetic resonance imaging; NR, not reported; SNRB, selective nerve root block.
